# Supplementary material for: Genome Editing Using TALENs in Blind Mexican Cavefish, Astyanax mexicanus
Source: PubMed Central journal article supplement (PMC4361574; doi:10.1371/journal.pone.0119370), 2015-03-16
Supplement: pone.0119370.s002.pdf [file pone.0119370.s002.pdf]

| TALEN         | Total mRNA concentration | Parental tank ID | Number of live embryos | Total number of embryos | Percentage survival | Trial |
|---------------|--------------------------|------------------|------------------------|-------------------------|---------------------|-------|
| Control       | 0                        | 19               | 24                     | 41                      | 59                  | 1a    |
| Control       | 0                        | 27               | 168                    | 300                     | 56                  | 1a    |
| Control       | 0                        | 18               | 174                    | 194                     | 90                  | 1a    |
| Total control | 0                        | 19+27+18         | 366                    | 535                     | 68                  | 1a    |
| Oca2 exon 9   | 400 pg                   | 19               | 49                     | 101                     | 49                  | 1a    |
| Oca2 exon 9   | 800 pg                   | 19+27            | 33                     | 85                      | 39                  | 1a    |
| Mc1r          | 400 pg                   | 28               | 23                     | 33                      | 70                  | 1a    |
| Mc1r          | 800 pg                   | 28               | 59                     | 108                     | 55                  | 1a    |
| Oca2 exon 21  | 400 pg                   |                  | 15                     | 53                      | 28                  | 1b    |
| Control       | 0                        | 19               | 138                    | 196                     | 70                  | 1c    |
| Control       | 0                        | 28               | 300                    | 527                     | 57                  | 1c    |
| Total control | 0                        | 19+28            | 438                    | 723                     | 61                  | 1c    |
| Oca2 exon 9   | 100 pg                   | 28               | 30                     | 55                      | 55                  | 1c    |
| Oca2 exon 9   | 200 pg                   | 19               | 46                     | 68                      | 68                  | 1c    |
| Control       | 0                        | 30               | 19                     | 28                      | 68                  | 2     |
| Control       | 0                        | 28+29            | 305                    | 438                     | 70                  | 2     |
| Total control | 0                        | 28+29+30         | 324                    | 466                     | 70                  | 2     |
| Oca2 exon 21  | 400 pg                   | 29               | 63                     | 140                     | 45                  | 2     |
| Oca2 exon 9   | 400 pg                   | 30               | 58                     | 132                     | 44                  | 2     |
| Oca2 exon 9   | 800 pg                   | 28               | 73                     | 103                     | 71                  | 2     |
| Mc1r          | 400 pg                   | 28               | 53                     | 109                     | 49                  | 2     |
| Mc1r          | 800 pg                   | 28               | 56                     | 96                      | 58                  | 2     |
| Total control | 0                        | 30               | 354                    | 521                     | 68                  | 3     |
| Oca2 exon 21  | 400 pg                   | 30               | 106                    | 147                     | 72                  | 3     |
| Oca2 exon 9   | 400 pg                   | 30               | 67                     | 99                      | 68                  | 3     |
| Oca2 exon 9   | 800 pg                   | 30               | 120                    | 176                     | 68                  | 3     |
| Mc1r          | 400 pg                   | 30               | 50                     | 96                      | 52                  | 3     |
| Mc1r          | 800 pg                   | 30               | 86                     | 142                     | 61                  | 3     |

**Supplemental Table 1. Percentage of surviving embryos at 9-12 hours post injection.**

The number of total and surviving embryos were calculated for control and injected embryos in the morning after one set of injections. mRNA is the total amount of mRNA injected per embryo. Parental tank ID indicates which tank of parents the each set of embryos was collected from. Percentage survival was calculated by dividing the number of living embryos by the total number of embryos. We performed the survival experiments 3 times, and each trial is indicated by the Trial number. Note that the trial 1 of the injections was done on 3 different days. The different days are indicated by a-c in the Trial column. Note that the lower concentrations of *oca2* TALEN (100 pg and 200 pg) did not produce mutations (data not shown) or induce bent bodies, and as such, we only performed these injections once.
