# Supplementary material for: Genome Editing Using TALENs in Blind Mexican Cavefish, Astyanax mexicanus
Source: PubMed Central journal article supplement (PMC4361574; doi:10.1371/journal.pone.0119370), 2015-03-16
Supplement: pone.0119370.s003.pdf [file pone.0119370.s003.pdf]

| Comparison                             | $\chi^2$ | df | p-value |
|----------------------------------------|----------|----|---------|
| Control, Mc1r 400 pg                   | 16.1     | 1  | 0.0004  |
| Control, Mc1r 800 pg                   | 8.3      | 1  | 0.028   |
| Control, Oca2 exon 21 400 pg           | 18.2     | 1  | 0.0001  |
| Control, Oca2 exon 9 400 pg            | 23.3     | 1  | 0.00001 |
| Control, Oca2 exon 9 800 pg            | 2.1      | 1  | 1       |
| Mc1r 400 pg, Mc1r 800 pg               | 1.5      | 1  | 1       |
| Oca2 exon 9 400 pg, Oca2 exon 9 800 pg | 6.7      | 1  | 0.069   |

**Supplemental Table 2. Chi square statistics.**

Chi-square tests were performed on total surviving and total dead embryos at 9-12 hours post fertilization, comparing different injected conditions to control or each other.  $\chi^2$  is the chi-square statistic, df is degrees freedom and p-value is the Bonferroni-corrected p-value.
